# Supplementary material for: MnTnHex-2-PyP5+, Coupled to Radiation, Suppresses Metastasis of 4T1 and MDA-MB-231 Breast Cancer via AKT/Snail/EMT Pathways
Source: Antioxidants (Basel). 2021 Nov 5;10(11):1769. doi: 10.3390/antiox10111769 (PMC8615021; doi:10.3390/antiox10111769)
Supplement: Supplementary file 1 [file antioxidants-10-01769-s001.zip › antioxidants-1417222-supplementary.pdf]

Supplemental Material

Title: MnTnHex-2-PyP5+, coupled to radiation, suppresses metastasis of 4T1 and MDA-MB-231 breast cancer via AKT/Snail/EMT pathways

Authors: Sung Won Shin<sup>1,2,†</sup>, Changhoon Choi<sup>1,†</sup>, Hakyoung Kim<sup>3</sup>, Sohee Park<sup>1</sup>, Shin-Yeong Kim<sup>1</sup>, Yeeun Kim<sup>1</sup>, Ines Batinic-Haberle<sup>4,\*</sup> and Won Park<sup>1,2,\*</sup>

Journal: Antioxidants

† These two authors contributed equally to this work.

\* These authors contribute equally to this manuscript.

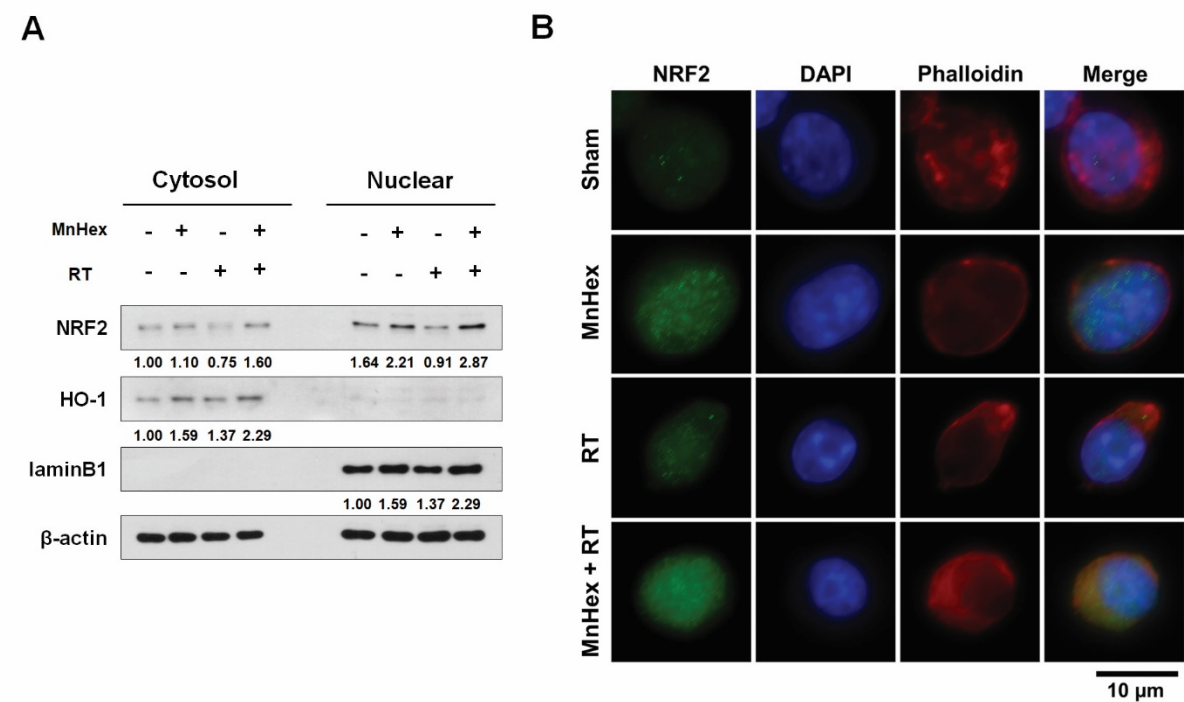

**Figure S1. MnHex activates NRF2 signaling in 4T1 cells.** (A) Subcellular fractionation revealed an increase in nuclear NRF2 and cytosolic HO-1 expressions by MnHex treatment. Lamin B1 was used as a nuclear marker and β-actin was used as a loading control. (B) Immunofluorescence further supported nuclear enrichment of NRF2 by MnHex treatment.



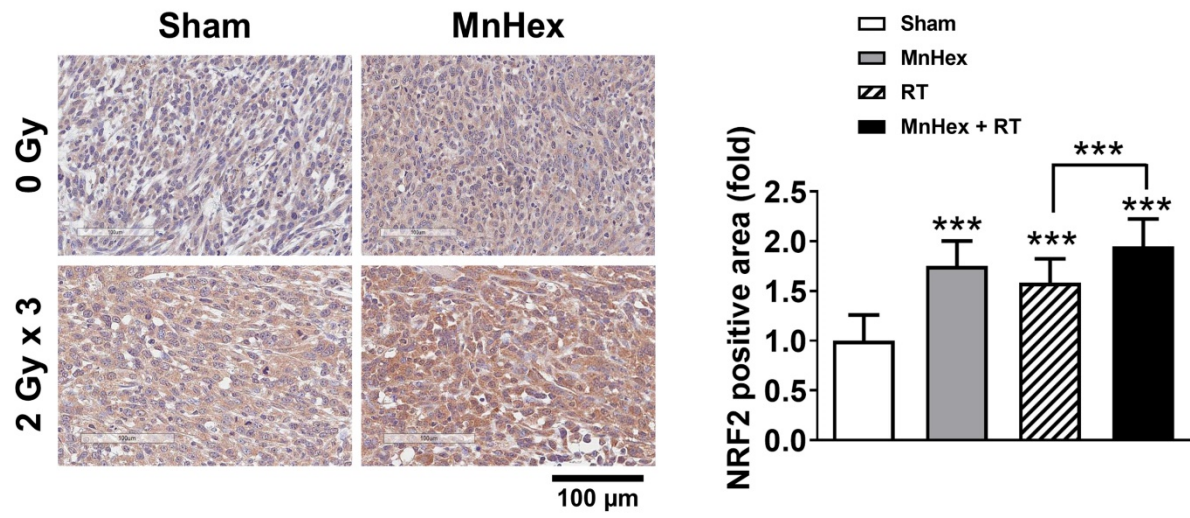

**Figure S3. Immunohistochemistry of NRF2 shows that MnHex and RT increase NRF2 expression in 4T1 xenograft tumor tissues.** 4T1 tumors were harvested from mice on day 15. Data are presented as mean  $\pm$  SD (n=15); \*\*\*p < 0.001.

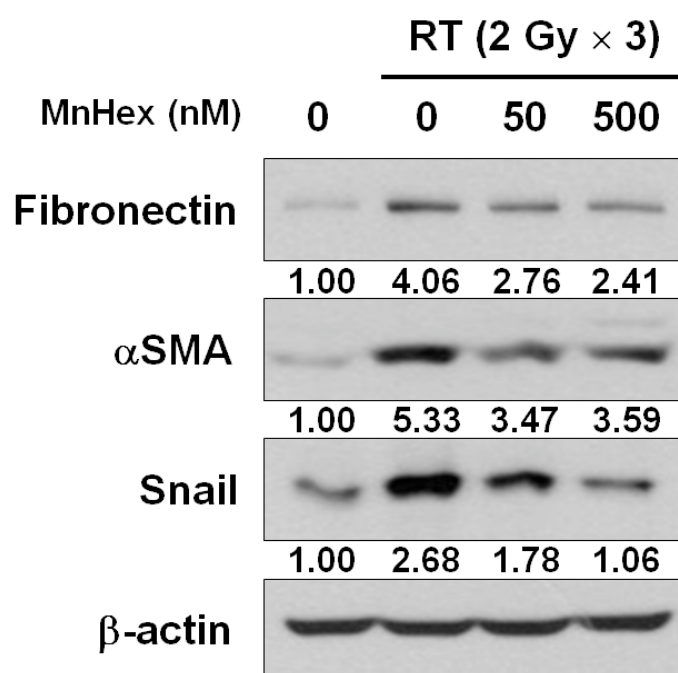

**Figure S4. MnHex treatment suppresses RT-induced expression of mesenchymal markers in MCF7 cells.** MCF7 cells were pre-incubated with the indicated concentrations of MnHex for 4 h, followed by fractionated RT. β-actin was used as a loading control.
